# Supplementary material for: A multivariate model for the prediction of pregnancy following laparoscopic artificial insemination of sheep
Source: PubMed Central journal article supplement — Sci Rep. 2024 Nov 11;14:27556. doi: 10.1038/s41598-024-79253-x (PMC11555048; doi:10.1038/s41598-024-79253-x), 2024-11-11

**Supplementary File 1:** Year of drop coloured electric ear tag identification for sheep (modified from [107]).

| Year of Drop | Colour Ear Tag |
|--------------|----------------|
| 2017         | White          |
| 2018         | Orange         |
| 2019         | Green          |
| 2020         | Purple         |
| 2021         | Yellow         |

**Supplementary File 2.** The standardisation of intra-abdominal fat scores assessed at AI by inseminator, scored one to five.

| Score | Figure                                                                              | Visual Description                                                            |
|-------|-------------------------------------------------------------------------------------|-------------------------------------------------------------------------------|
| 1     | 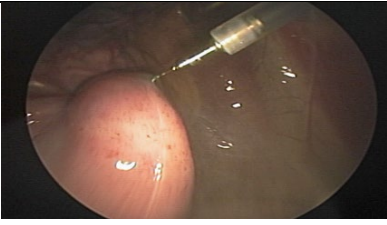   | <p>Little to no fat is present within the abdominal cavity.</p>               |
| 2     |    | <p>A small amount of fat lining the abdominal region of the ewe.</p>          |
| 3     |   | <p>A moderate amount of fat lining the abdominal region of the ewe.</p>       |
| 4     |  | <p>Large masses of internal fat covering the abdominal region of the ewe.</p> |
| 5     |  | <p>Excessive amount of fat around the abdominal region of the ewe.</p>        |

**Supplementary File 3.** The standardisation of uterine tone scores assessed at AI by inseminator, scored one to five.

| Score | Figure                                                                              | Visual Description                                                                     |
|-------|-------------------------------------------------------------------------------------|----------------------------------------------------------------------------------------|
| 1     | 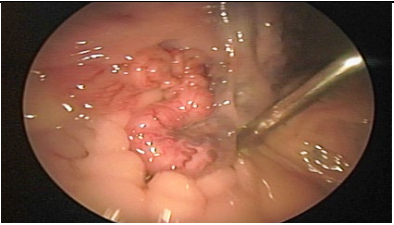   | Flaccid uterine horns.                                                                 |
| 2     |    | Soft uterine horns.                                                                    |
| 3     |   | Moderate swelling of uterine horns.                                                    |
| 4     |  | The greater amount of swelling and some resistance to penetration during insemination. |
| 5     |  | Swollen/ turgid uterine horns. Resistance to penetration during insemination.          |

**Supplementary File 4.** Describes the percentage of ewes pregnancy for each level within the categorical factors recorded in the data set.

| <b>Variable</b>               | <b>Category</b> | <b>Number of ewes</b> | <b>Number of Pregnant ewes</b> | <b>Percentage of Ewes Pregnant (%)</b> |
|-------------------------------|-----------------|-----------------------|--------------------------------|----------------------------------------|
| Intra-abdominal Fat (Grouped) | 1+2             | 3922                  | 2328                           | 59.36                                  |
|                               | 3               | 13426                 | 8794                           | 65.50                                  |
|                               | 4+5             | 4789                  | 3445                           | 71.94                                  |
| Ewe Age (Grouped)             | <2              | 6562                  | 4136                           | 63.03                                  |
|                               | 3               | 7000                  | 4658                           | 66.54                                  |
|                               | 4               | 3920                  | 2658                           | 67.81                                  |
|                               | 5+              | 3614                  | 2423                           | 67.04                                  |
| Uterine Tone (Grouped)        | 1+2             | 2792                  | 1616                           | 57.88                                  |
|                               | 3               | 12407                 | 8089                           | 65.20                                  |
|                               | 4+5             | 7162                  | 5034                           | 70.29                                  |
| Semen Type                    | Frozen          | 27584                 | 18379                          | 66.63                                  |
|                               | Fresh           | 2670                  | 1744                           | 65.32                                  |
| Package Type                  | Straw           | 8260                  | 5395                           | 65.31                                  |
|                               | Pellet          | 16129                 | 10854                          | 67.29                                  |
| AI Time Post CIDR Removal     | <48             | 460                   | 259                            | 56.30                                  |
|                               | 48-50           | 3002                  | 2016                           | 67.16                                  |
|                               | 50-52           | 9108                  | 6009                           | 65.97                                  |
|                               | 52-54           | 8319                  | 5448                           | 65.49                                  |
|                               | 54-56           | 2160                  | 1396                           | 64.63                                  |
|                               | >56             | 240                   | 163                            | 67.92                                  |

**Supplementary File 5.** Correlation plots for *in vitro* semen traits at (a) 0h post-thaw, (b) 3h post-thaw, and (c) 6 h post-thaw

(a)

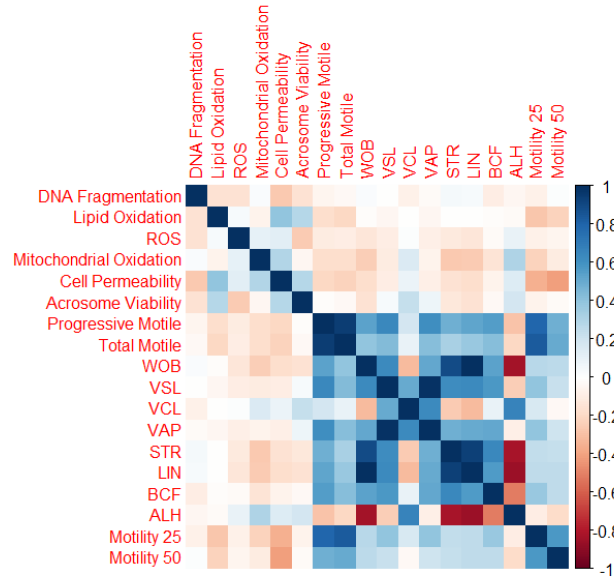

(b)

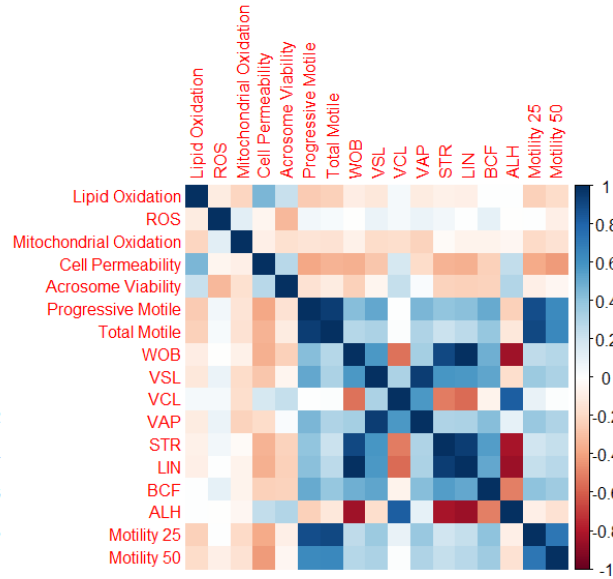

(c)

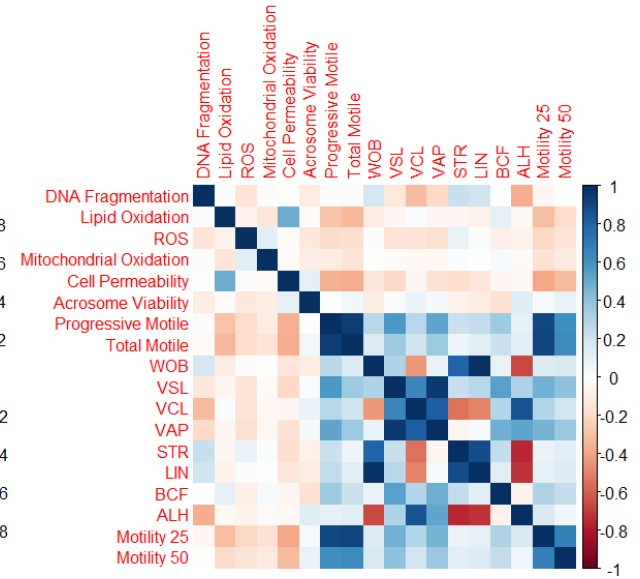

Supplement: 41598_2024_79253_MOESM1_ESM.pdf [file 41598_2024_79253_MOESM1_ESM.pdf]
